# Supplementary material for: Synergistic effect of functionalized graphene oxide and carbon nanotube hybrids on mechanical properties of epoxy composites
Source: PubMed Central journal article supplement — RSC Adv. 2018 Nov 16;8(67):38689–700. doi: 10.1039/c8ra08312f (PMC9090624; doi:10.1039/c8ra08312f), 2018-11-16
Supplement: RA-008-C8RA08312F-s001.pdf [file RA-008-C8RA08312F-s001.pdf]

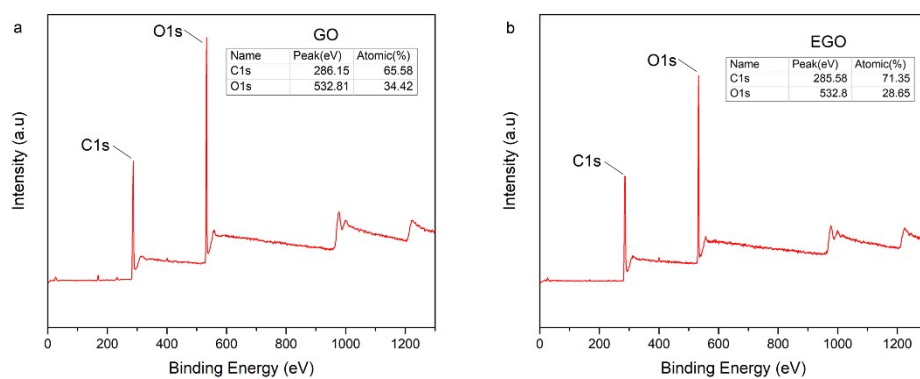

Figure S1. XPS spectra of (a) GO, (b) EGO.

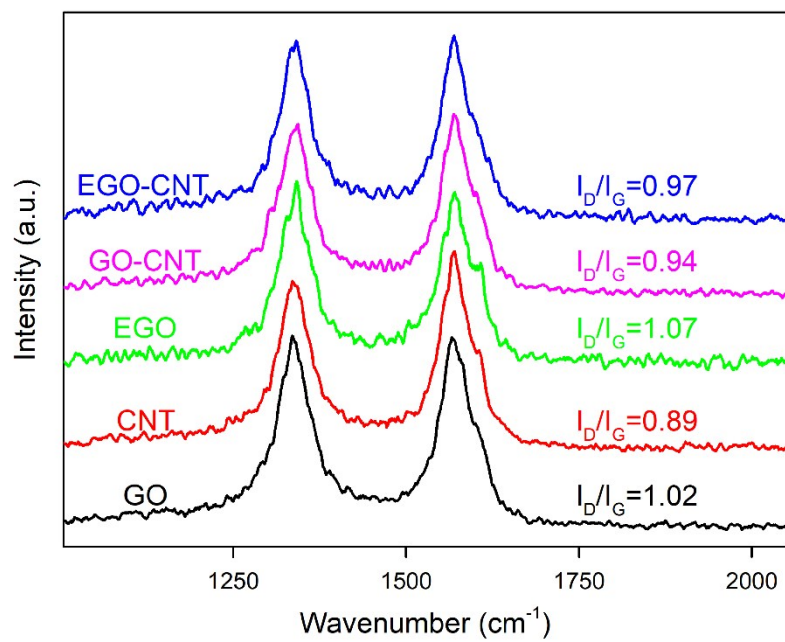

Figure S2 The Raman spectra of GO, CNT, EGO, GO-CNT and EGO-CNT.

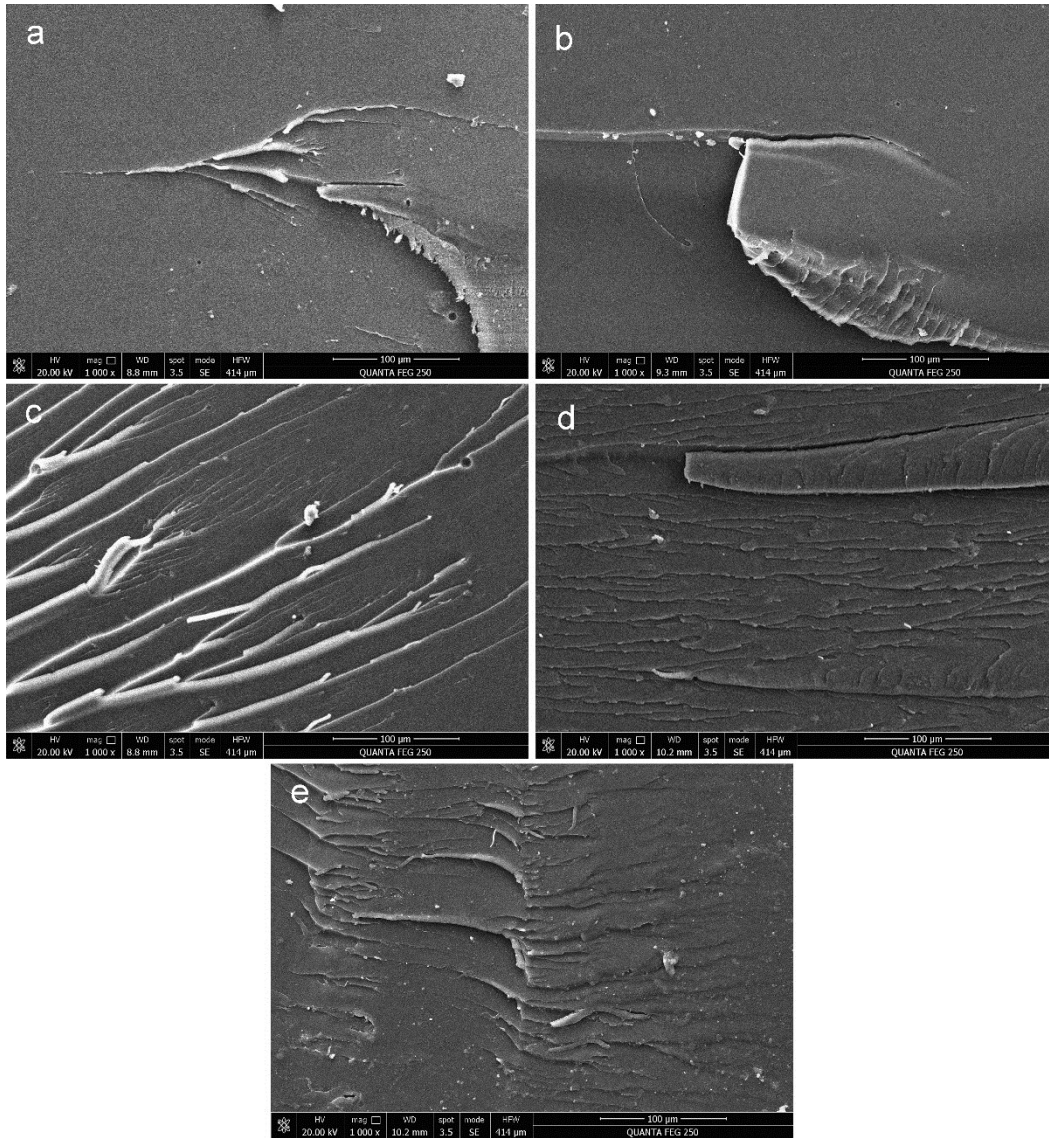

Figure S3 SEM images of fracture surfaces of SENB samples: (a) CNT/EP, (b) GO/EP, (c) EGO/EP, (d) GO-CNT/EP, (e) EGO-CNT/EP, respectively. The crack propagation direction is from left to right.
